# Supplementary material
Source: PubMed Central journal article supplement (PMC7704719)
Supplement: NIHMS1643924-supplement-1.pdf [file NIHMS1643924-supplement-1.pdf]

**Supplemental Table 1: Suicide counts and rate distributions among adults 18-64 years of age in the United States, 2000-2015**

| Group              | Count (%)    | State quarterly (3-month) suicide rates per 100,000 |      |                  |        |                  |       |
|--------------------|--------------|-----------------------------------------------------|------|------------------|--------|------------------|-------|
|                    |              | Mean (std)                                          | min  | 25 <sup>th</sup> | median | 75 <sup>th</sup> | max   |
| <b>Education</b>   |              |                                                     |      |                  |        |                  |       |
| ≤High school       | 261,068 (58) | 6.01 (2.49)                                         | 0.00 | 4.65             | 5.87   | 7.21             | 19.14 |
| Some college       | 106,959 (24) | 3.32 (1.65)                                         | 0.00 | 2.30             | 3.08   | 4.10             | 13.16 |
| ≥College           | 85,669 (19)  | 2.96 (1.94)                                         | 0.00 | 1.96             | 2.61   | 3.44             | 24.65 |
| <b>Age</b>         |              |                                                     |      |                  |        |                  |       |
| 18-24              | 58,720 (13)  | 3.96 (2.36)                                         | 0.00 | 2.56             | 3.48   | 4.68             | 27.07 |
| 25-34              | 88,840 (19)  | 4.10 (1.89)                                         | 0.00 | 2.87             | 3.80   | 4.96             | 16.01 |
| 35-44              | 106,661 (23) | 4.62 (1.93)                                         | 0.00 | 3.35             | 4.34   | 5.59             | 17.31 |
| 45-54              | 122,819 (27) | 5.03 (1.97)                                         | 0.00 | 3.71             | 4.81   | 6.11             | 16.04 |
| 55-64              | 85,116 (18)  | 4.30 (1.86)                                         | 0.00 | 3.09             | 4.09   | 5.27             | 13.83 |
| <b>Gender</b>      |              |                                                     |      |                  |        |                  |       |
| Men                | 360,096 (78) | 7.04 (2.28)                                         | 1.09 | 5.54             | 6.80   | 8.26             | 18.06 |
| Women              | 102,060 (22) | 1.88 (0.82)                                         | 0.00 | 1.35             | 1.77   | 2.32             | 7.00  |
| <b>Race</b>        |              |                                                     |      |                  |        |                  |       |
| Non-Hispanic White | 414,562 (90) | 4.86 (1.57)                                         | 0.00 | 3.82             | 4.72   | 5.72             | 14.01 |
| Other races        | 47,594 (10)  | 2.90 (2.99)                                         | 0.00 | 1.51             | 2.07   | 3.11             | 36.09 |

Supplemental Table 2: Effect estimates for models without adjustment for seasonality

|                               | Regular UI programs (2000-2015) |                         | All UI programs (2008-2013) |                         |
|-------------------------------|---------------------------------|-------------------------|-----------------------------|-------------------------|
|                               | $\beta$                         | 95% confidence interval | $\beta$                     | 95% confidence interval |
| <b>Adults 18-64</b>           | -                               | -0.120, -0.054          | -0.092                      | -0.126, -0.059          |
|                               | 0.087                           |                         |                             |                         |
| <b>Educational attainment</b> |                                 |                         |                             |                         |
| ≤high school                  | -                               | -0.222, -0.038          | -0.149                      | -0.302, 0.004           |
|                               | 0.130                           |                         |                             |                         |
| some college                  | -                               | -0.224, -0.090          | -0.236                      | -0.367, -0.104          |
|                               | 0.157                           |                         |                             |                         |
| ≥college grad                 | -                               | -0.153, 0.054           | -0.099                      | -0.228, 0.031           |
|                               | 0.050                           |                         |                             |                         |
| <b>Race</b>                   |                                 |                         |                             |                         |
| Non-Hispanic White            | -                               | -0.425, -0.234          | -0.316                      | -0.536, -0.097          |
|                               | 0.330                           |                         |                             |                         |
| All other groups              | 0.020                           | -0.118, 0.158           | 0.146                       | -0.117, 0.409           |
|                               |                                 |                         |                             |                         |
| <b>Gender</b>                 |                                 |                         |                             |                         |
| Men                           | -                               | -0.299, -0.160          | -0.208                      | -0.349, -0.067          |
|                               | 0.230                           |                         |                             |                         |
| Women                         | -                               | -0.094, 0.036           | -0.134                      | -0.265, -0.004          |
|                               | 0.029                           |                         |                             |                         |
| <b>Age (years)</b>            |                                 |                         |                             |                         |
| 18-24                         | 0.033                           | -0.061, 0.127           | 0.086                       | -0.107, 0.279           |
|                               |                                 |                         |                             |                         |
| 25-34                         | -                               | -0.202, -0.065          | -0.162                      | -0.294, -0.030          |
|                               | 0.134                           |                         |                             |                         |
| 35-44                         | -                               | -0.204, -0.071          | -0.192                      | -0.320, -0.063          |
|                               | 0.137                           |                         |                             |                         |
| 45-54                         | -                               | -0.296, -0.156          | -0.287                      | -0.425, -0.149          |
|                               | 0.226                           |                         |                             |                         |
| 55-64                         | -                               | -0.347, -0.185          | -0.277                      | -0.442, -0.114          |
|                               | 0.266                           |                         |                             |                         |

<sup>a</sup>Regular Programs includes State UI, UCFE, and UCX. Estimates are expressed per 10 percentage point increase.

<sup>b</sup>All Programs includes Emergency programs and Extended Benefit programs in addition to regular programs. Estimates are expressed per 10 percentage point increase.

<sup>c</sup> Models include terms for state and year fixed effects, state specific linear (state\*year) and quadratic (state\*year\*year) time trends, state quarterly unemployment rate and minimum wage, state yearly gross state product, personal income, and number of Temporary Assistance for Needy Families recipients. Referent groups are strata with the largest number of suicides: high school or less for education, White for race, men for gender, and 45-54 years for age.
